# Supplementary material for: DDK regulates replication initiation by controlling the multiplicity of Cdc45-GINS binding to Mcm2-7
Source: eLife journal article supplement (doi:10.7554/elife.65471), 2021-02-22
Supplement: supp [file elife-65471-supp-v1.zip]

Archive with 17 entries (17 files):
- elife_poa_e65471_Figure_1_figure_supplement_1.tif
- elife_poa_e65471_Figure_1_figure_supplement_2.tif
- elife_poa_e65471_Figure_1_figure_supplement_3.tif
- elife_poa_e65471_Figure_1_figure_supplement_4.tif
- elife_poa_e65471_Figure_1_figure_supplement_5.tif
- elife_poa_e65471_Figure_2_figure_supplement_1.tif
- elife_poa_e65471_Figure_2_figure_supplement_2.tif
- elife_poa_e65471_Figure_3_figure_supplement_1.tif
- elife_poa_e65471_Figure_3_figure_supplement_2.tif
- elife_poa_e65471_Figure_4_figure_supplement_1.tif
- elife_poa_e65471_Figure_4_figure_supplement_2.tif
- elife_poa_e65471_Figure_5_figure_supplement_1.tif
- elife_poa_e65471_Figure_5_figure_supplement_2.tif
- elife_poa_e65471_Figure_5_figure_supplement_3.tif
- elife_poa_e65471_Figure_6_figure_supplement_1.tif
- elife_poa_e65471_Supplementary_file_1.docx
- elife_poa_e65471_Transparent_Reporting_File.pdf
