# Supplementary figures and images for: DDK regulates replication initiation by controlling the multiplicity of Cdc45-GINS binding to Mcm2-7
Source: eLife journal article supplement (doi:10.7554/elife.65471), 2021-02-22

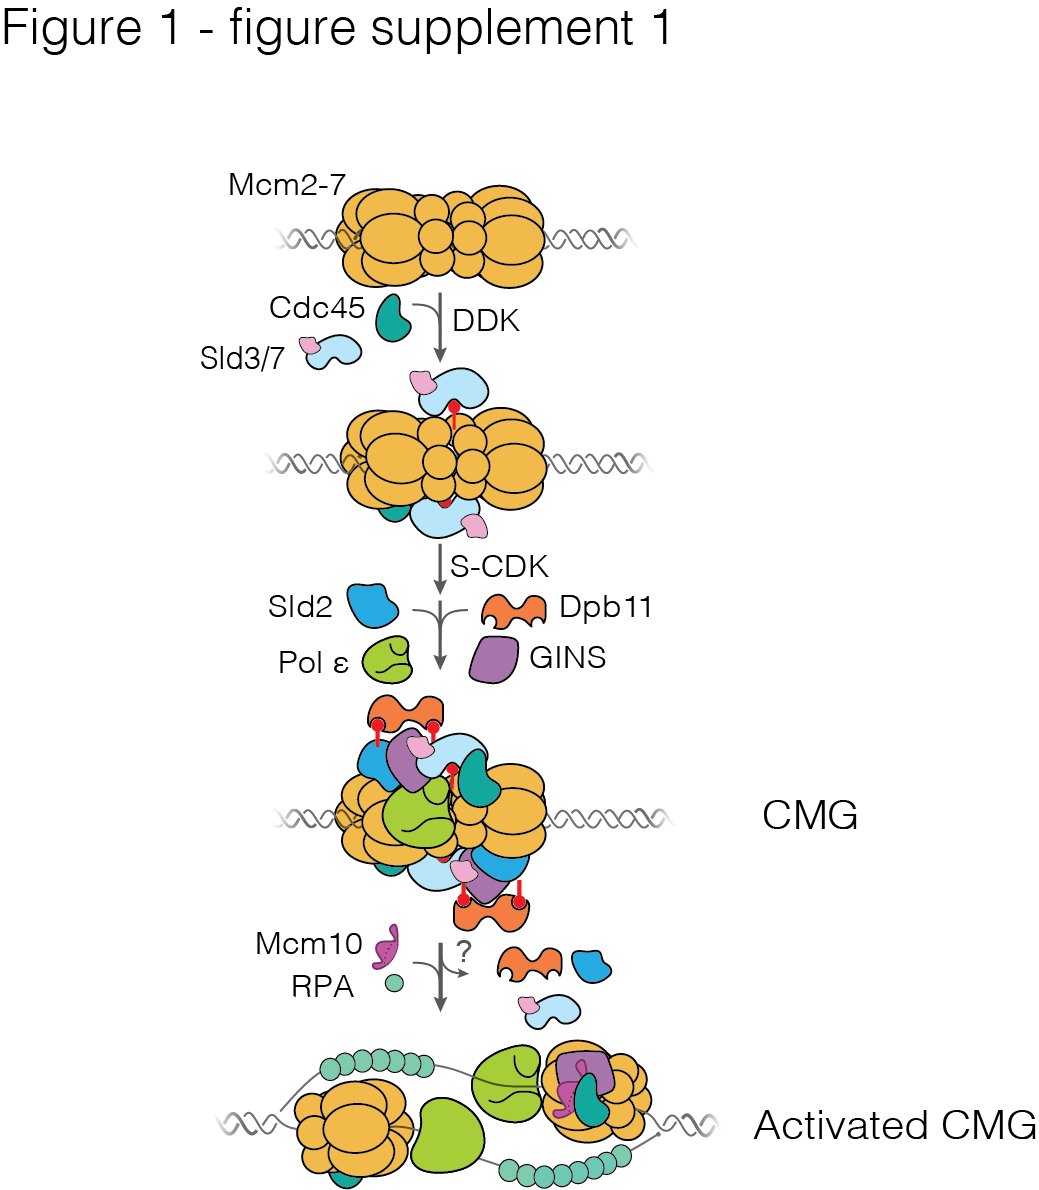

Supplement: supp [file elife-65471-supp-v1.zip › elife_poa_e65471_Figure_1_figure_supplement_1.tif]

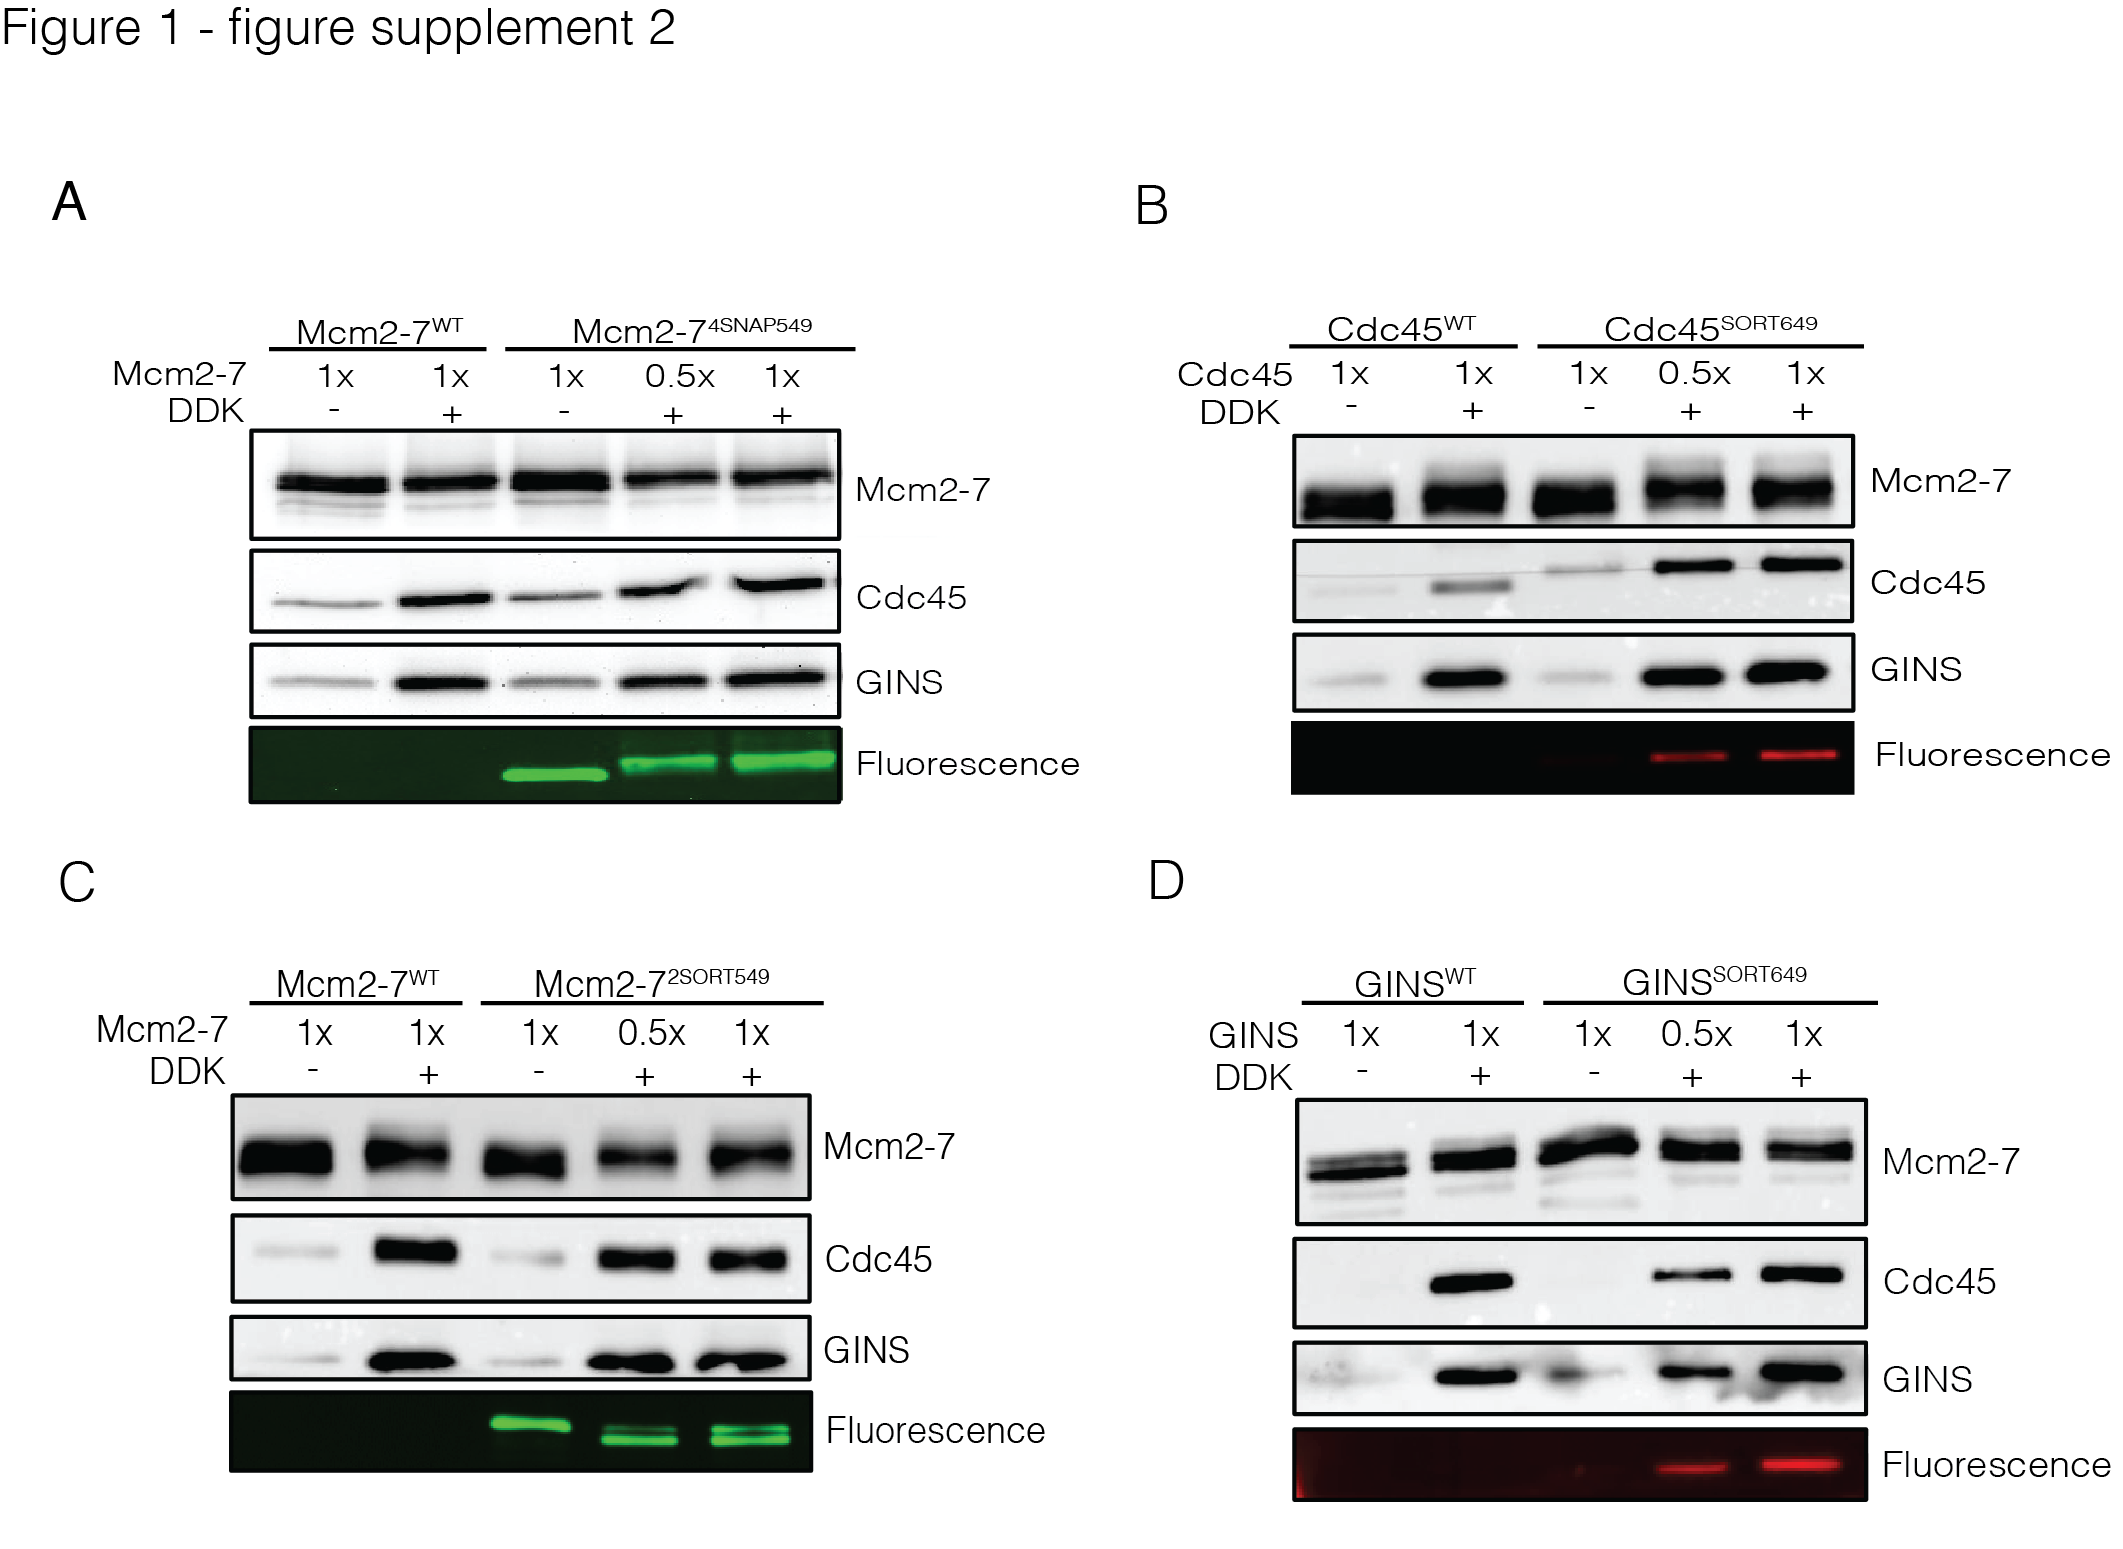

Supplement: supp [file elife-65471-supp-v1.zip › elife_poa_e65471_Figure_1_figure_supplement_2.tif]

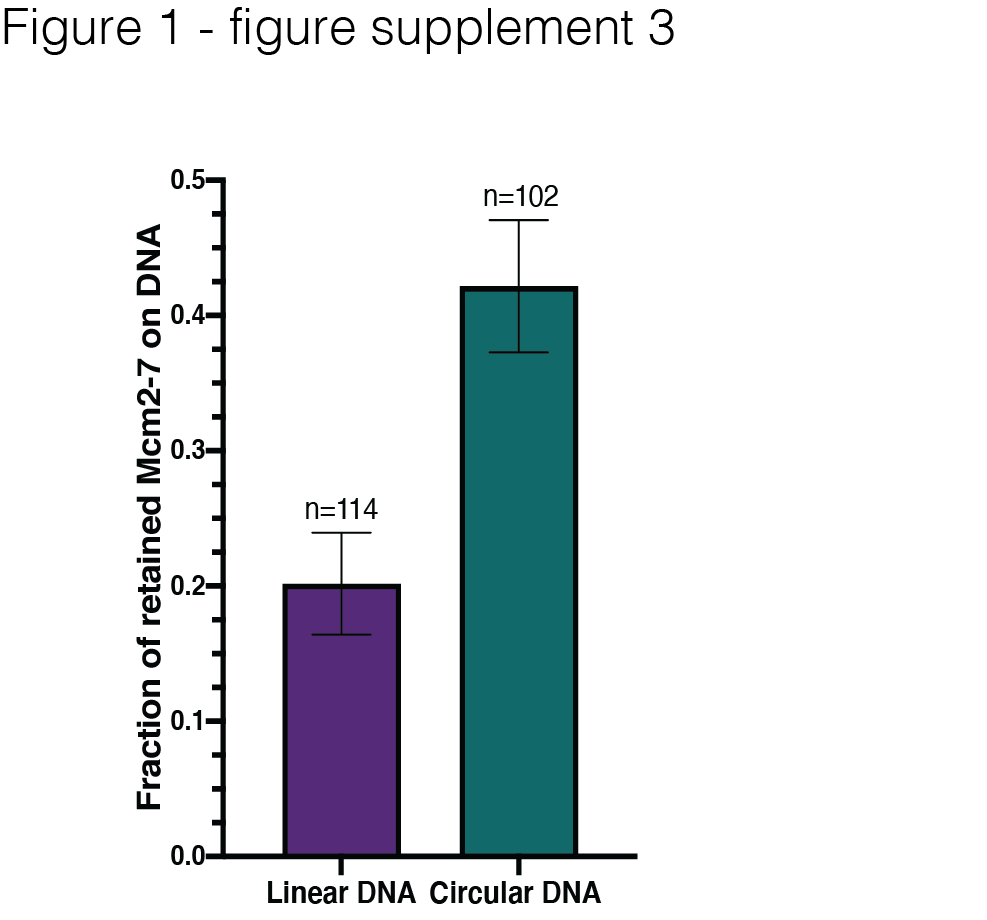

Supplement: supp [file elife-65471-supp-v1.zip › elife_poa_e65471_Figure_1_figure_supplement_3.tif]

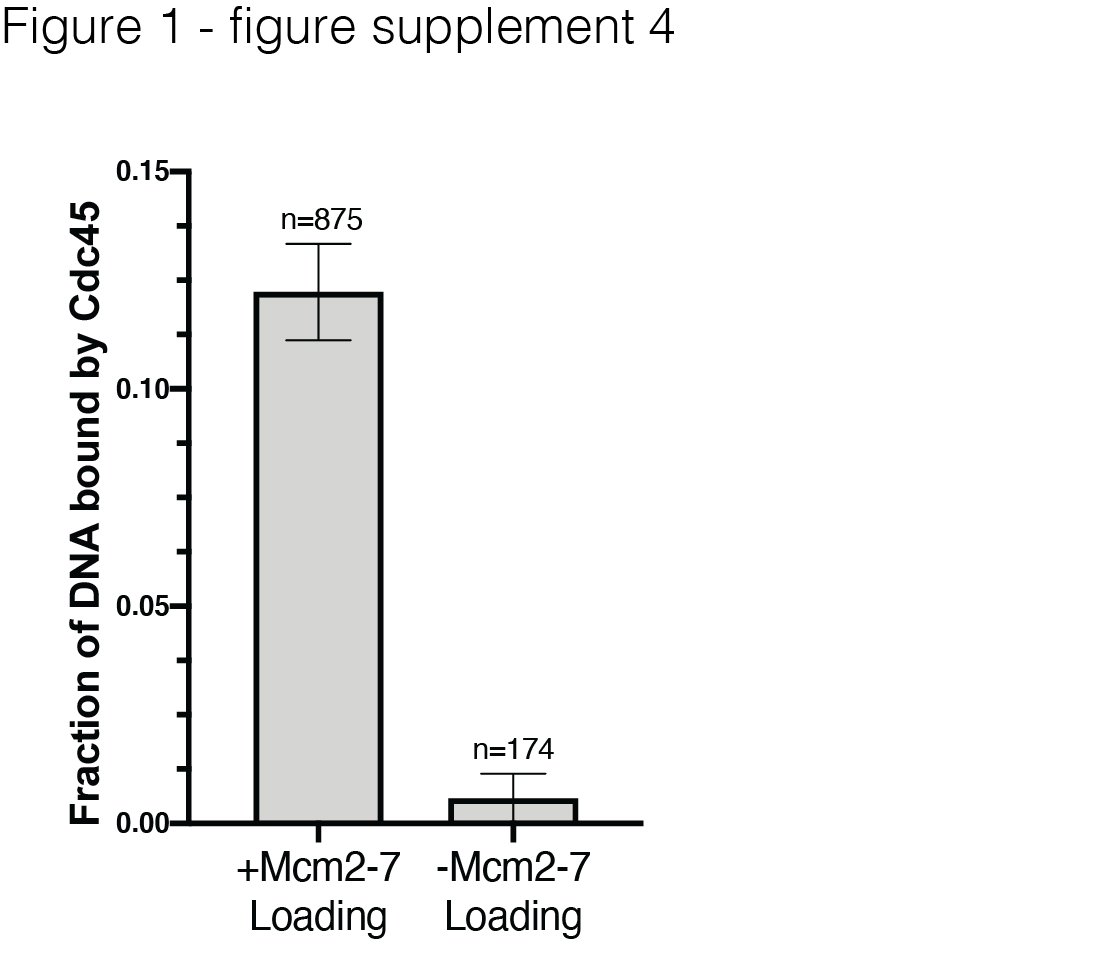

Supplement: supp [file elife-65471-supp-v1.zip › elife_poa_e65471_Figure_1_figure_supplement_4.tif]

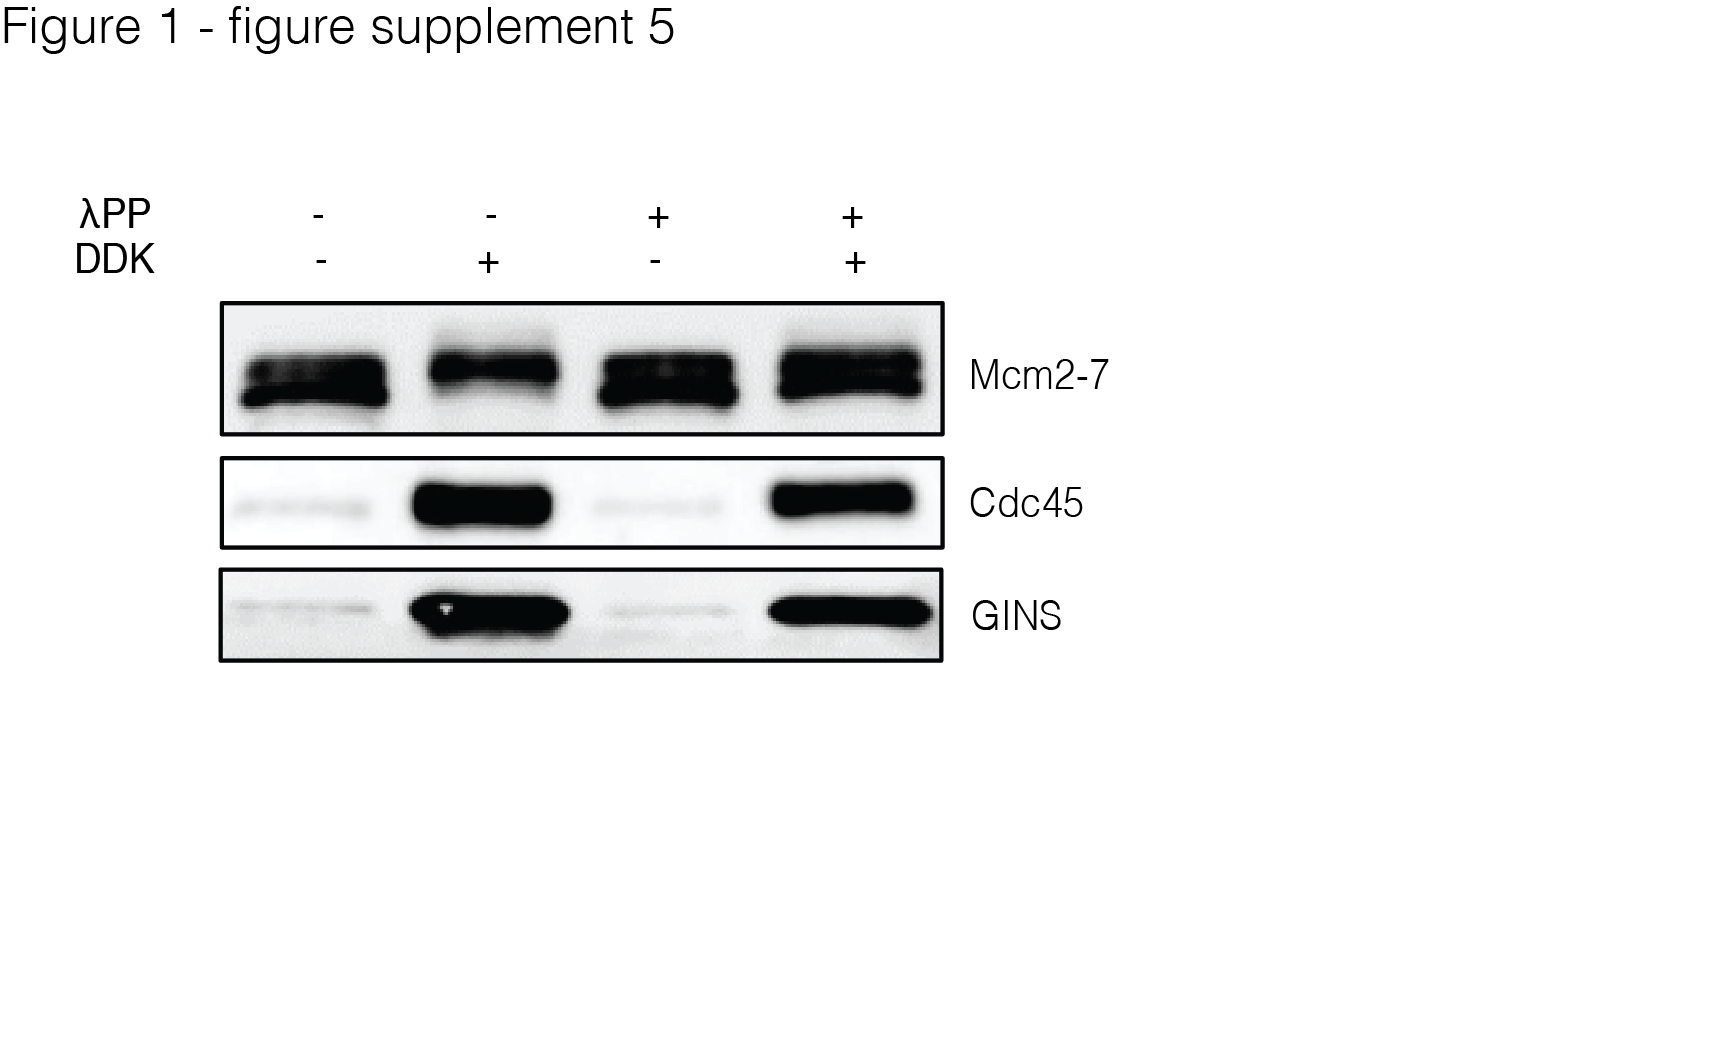

Supplement: supp [file elife-65471-supp-v1.zip › elife_poa_e65471_Figure_1_figure_supplement_5.tif]

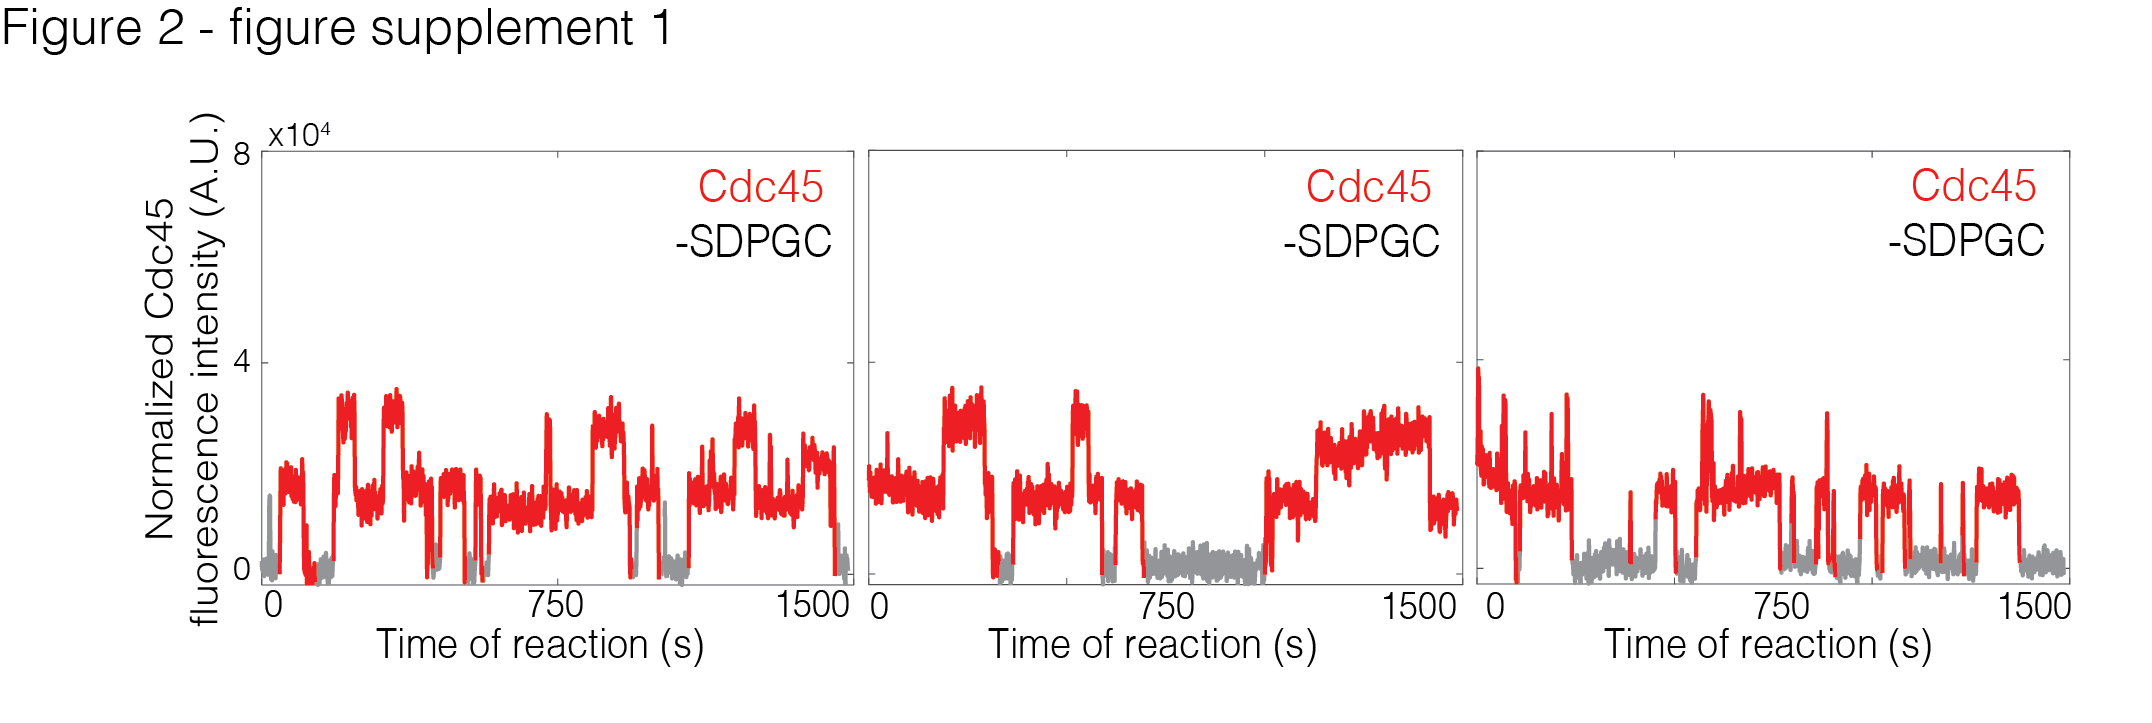

Supplement: supp [file elife-65471-supp-v1.zip › elife_poa_e65471_Figure_2_figure_supplement_1.tif]

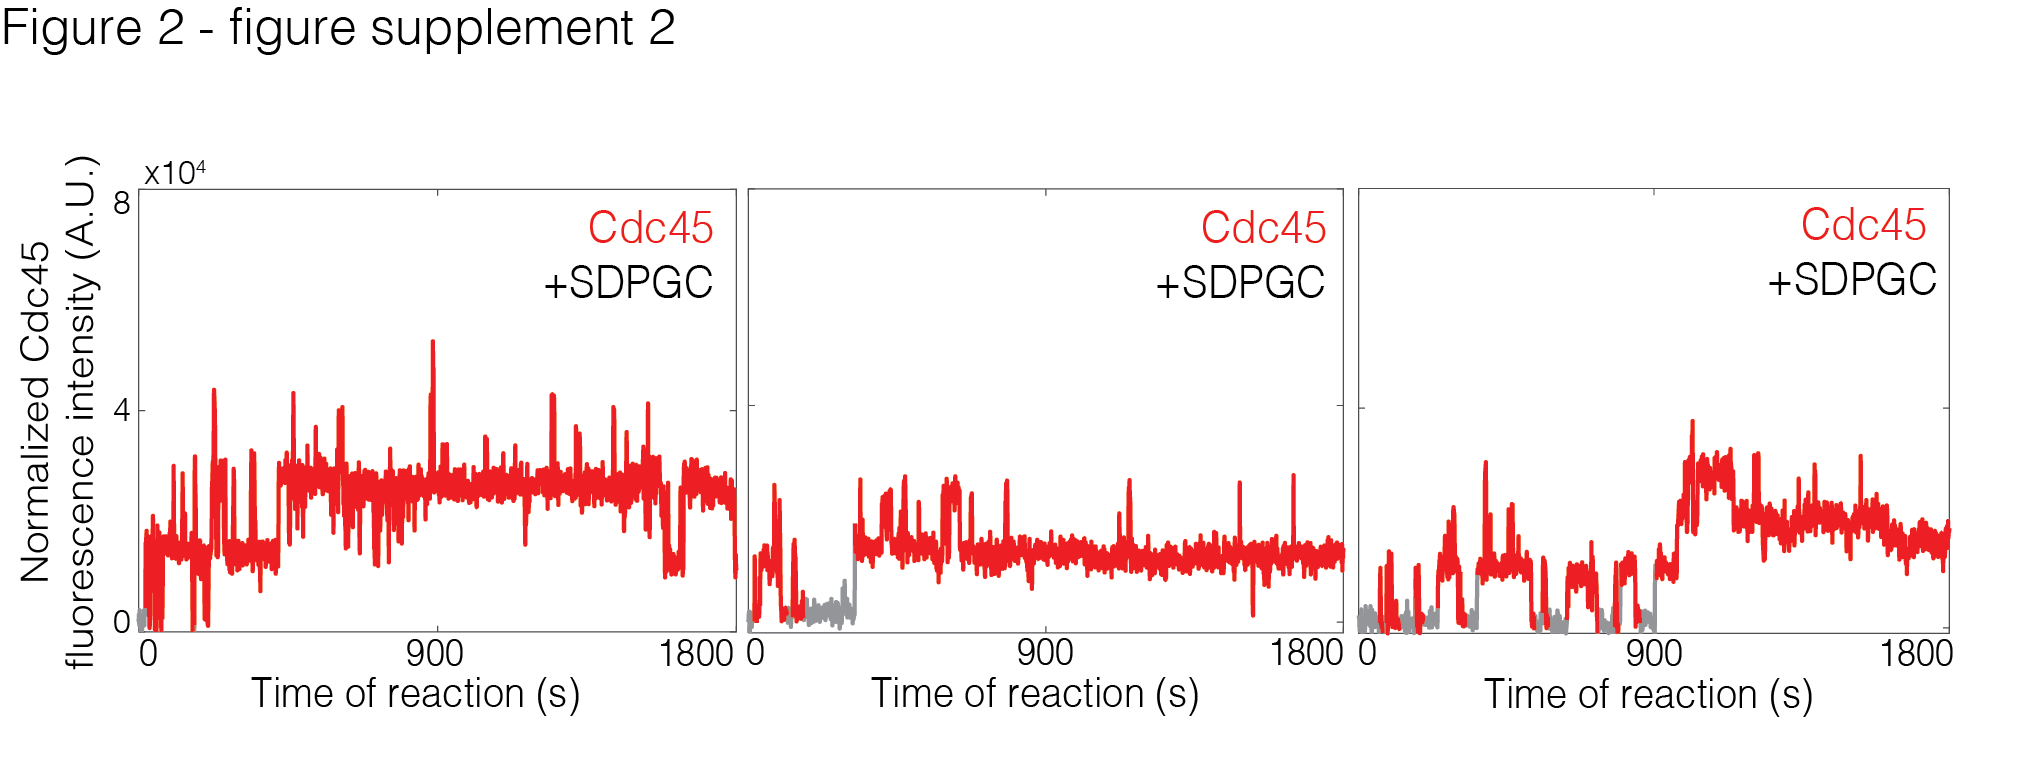

Supplement: supp [file elife-65471-supp-v1.zip › elife_poa_e65471_Figure_2_figure_supplement_2.tif]

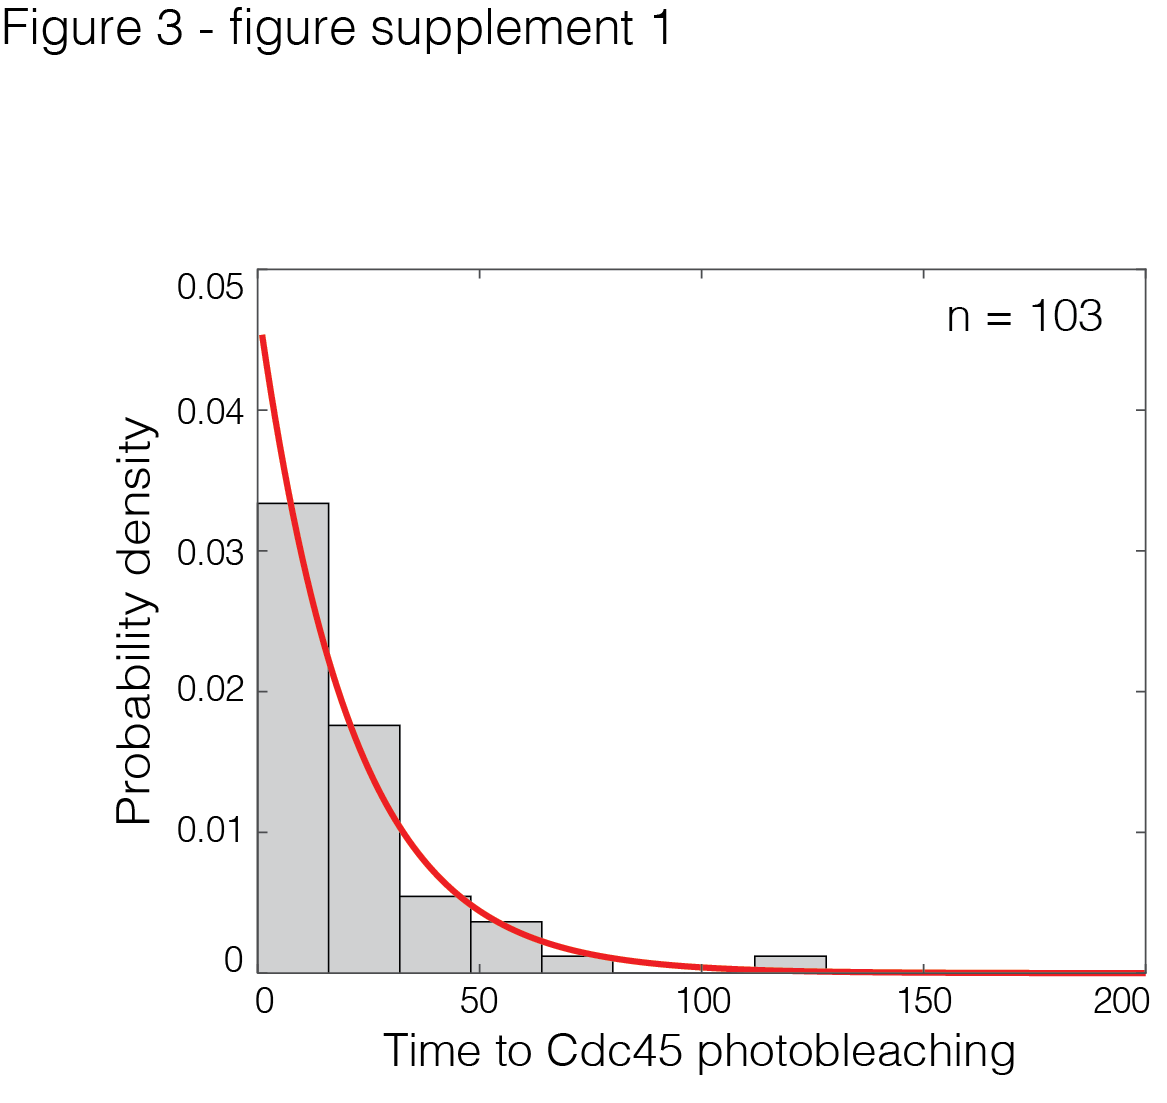

Supplement: supp [file elife-65471-supp-v1.zip › elife_poa_e65471_Figure_3_figure_supplement_1.tif]

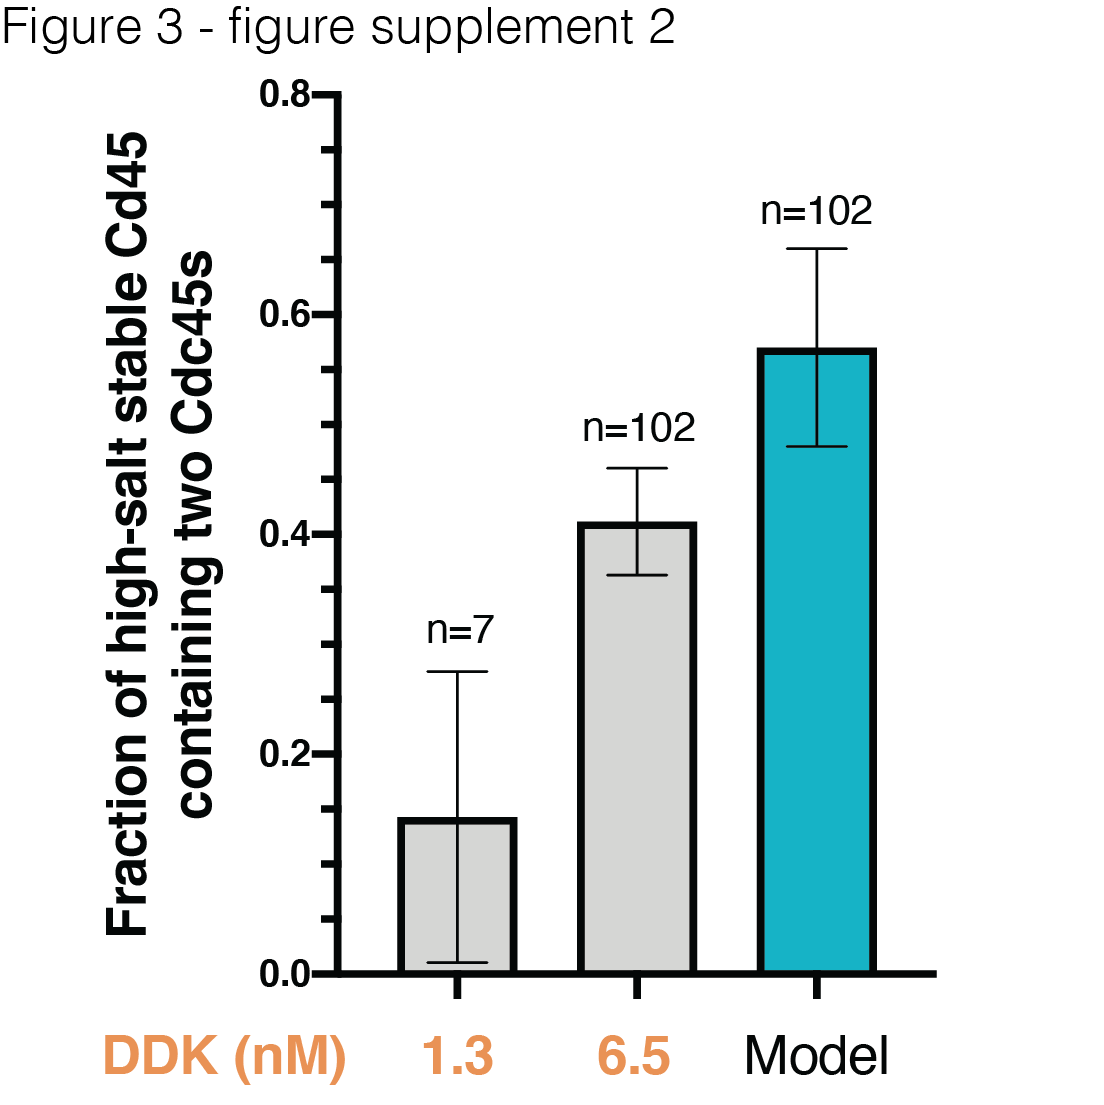

Supplement: supp [file elife-65471-supp-v1.zip › elife_poa_e65471_Figure_3_figure_supplement_2.tif]

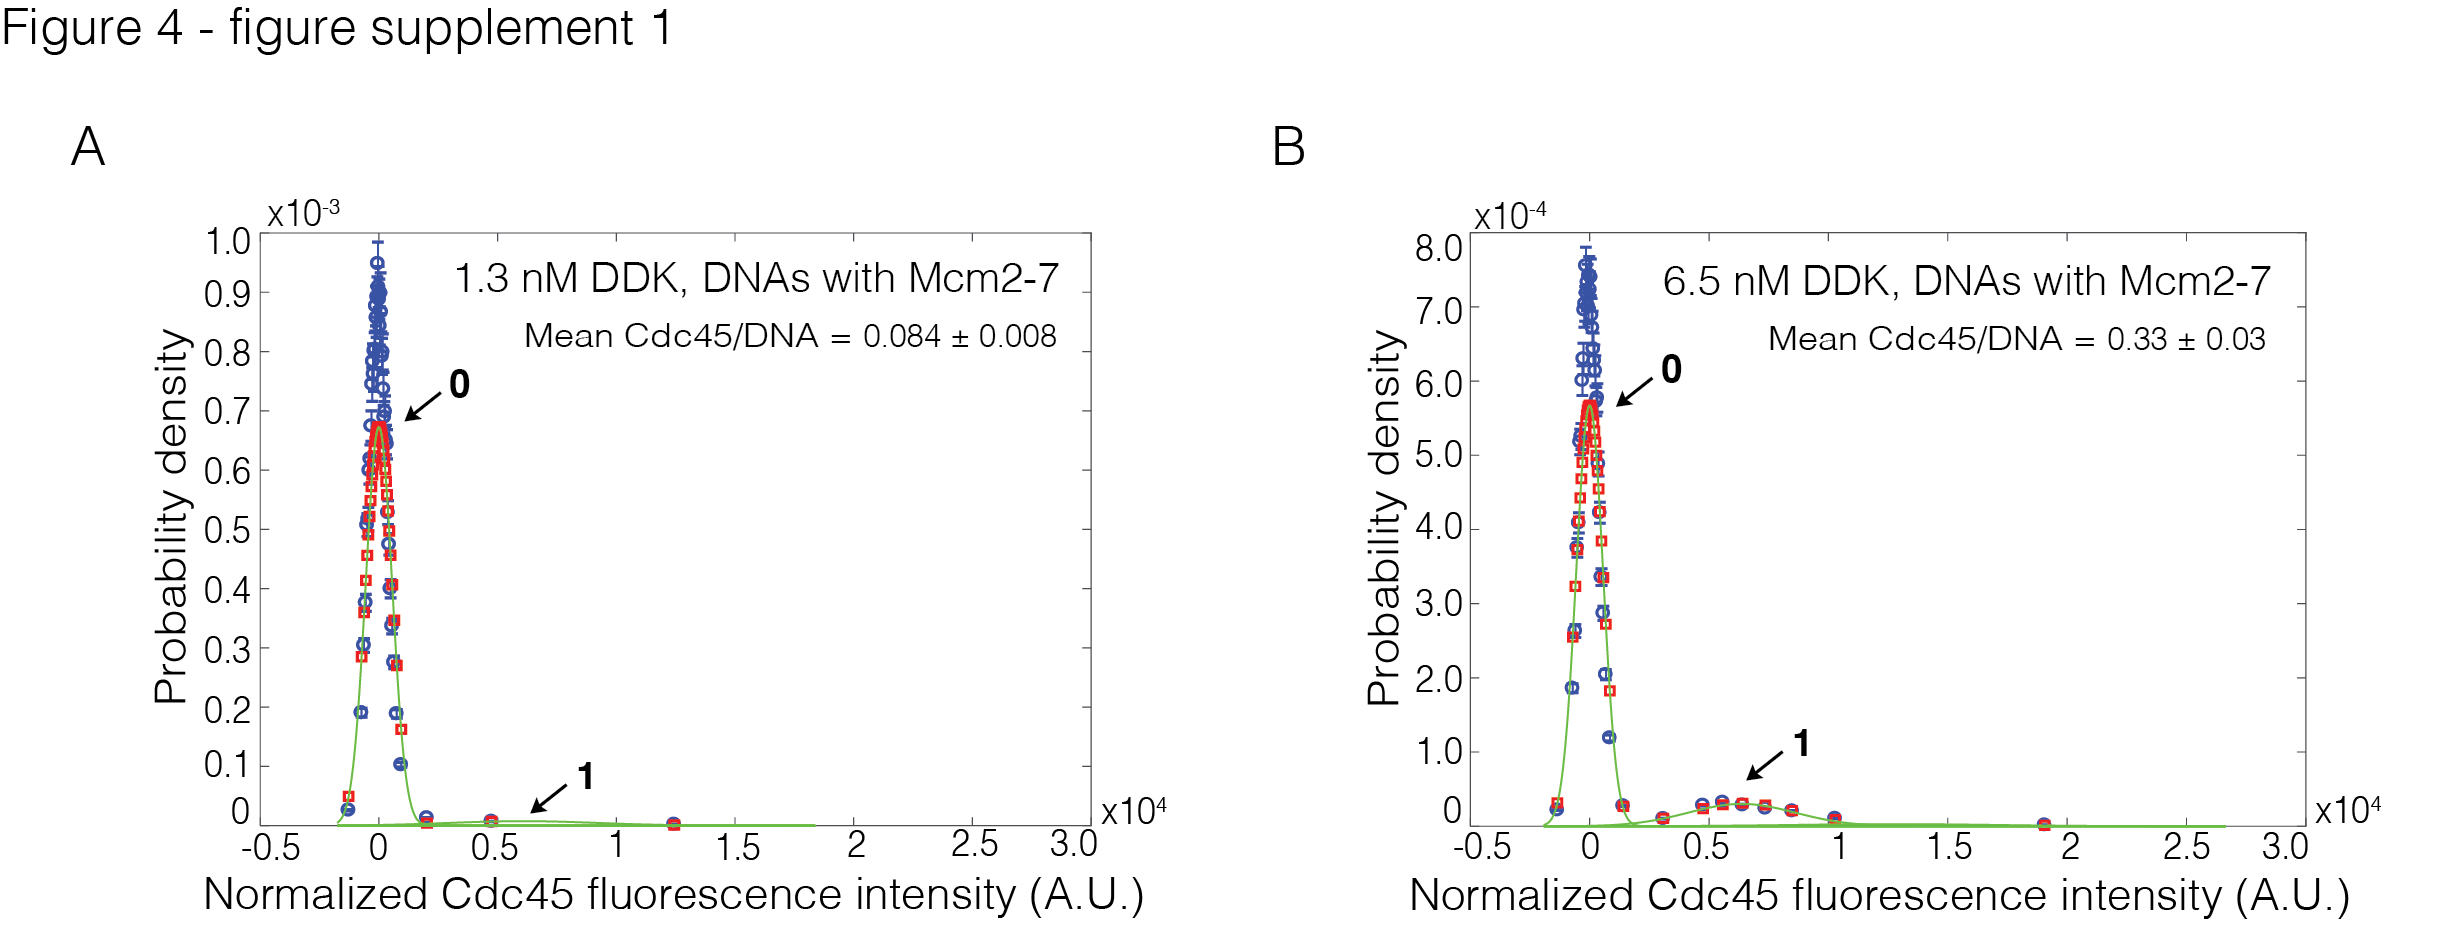

Supplement: supp [file elife-65471-supp-v1.zip › elife_poa_e65471_Figure_4_figure_supplement_1.tif]

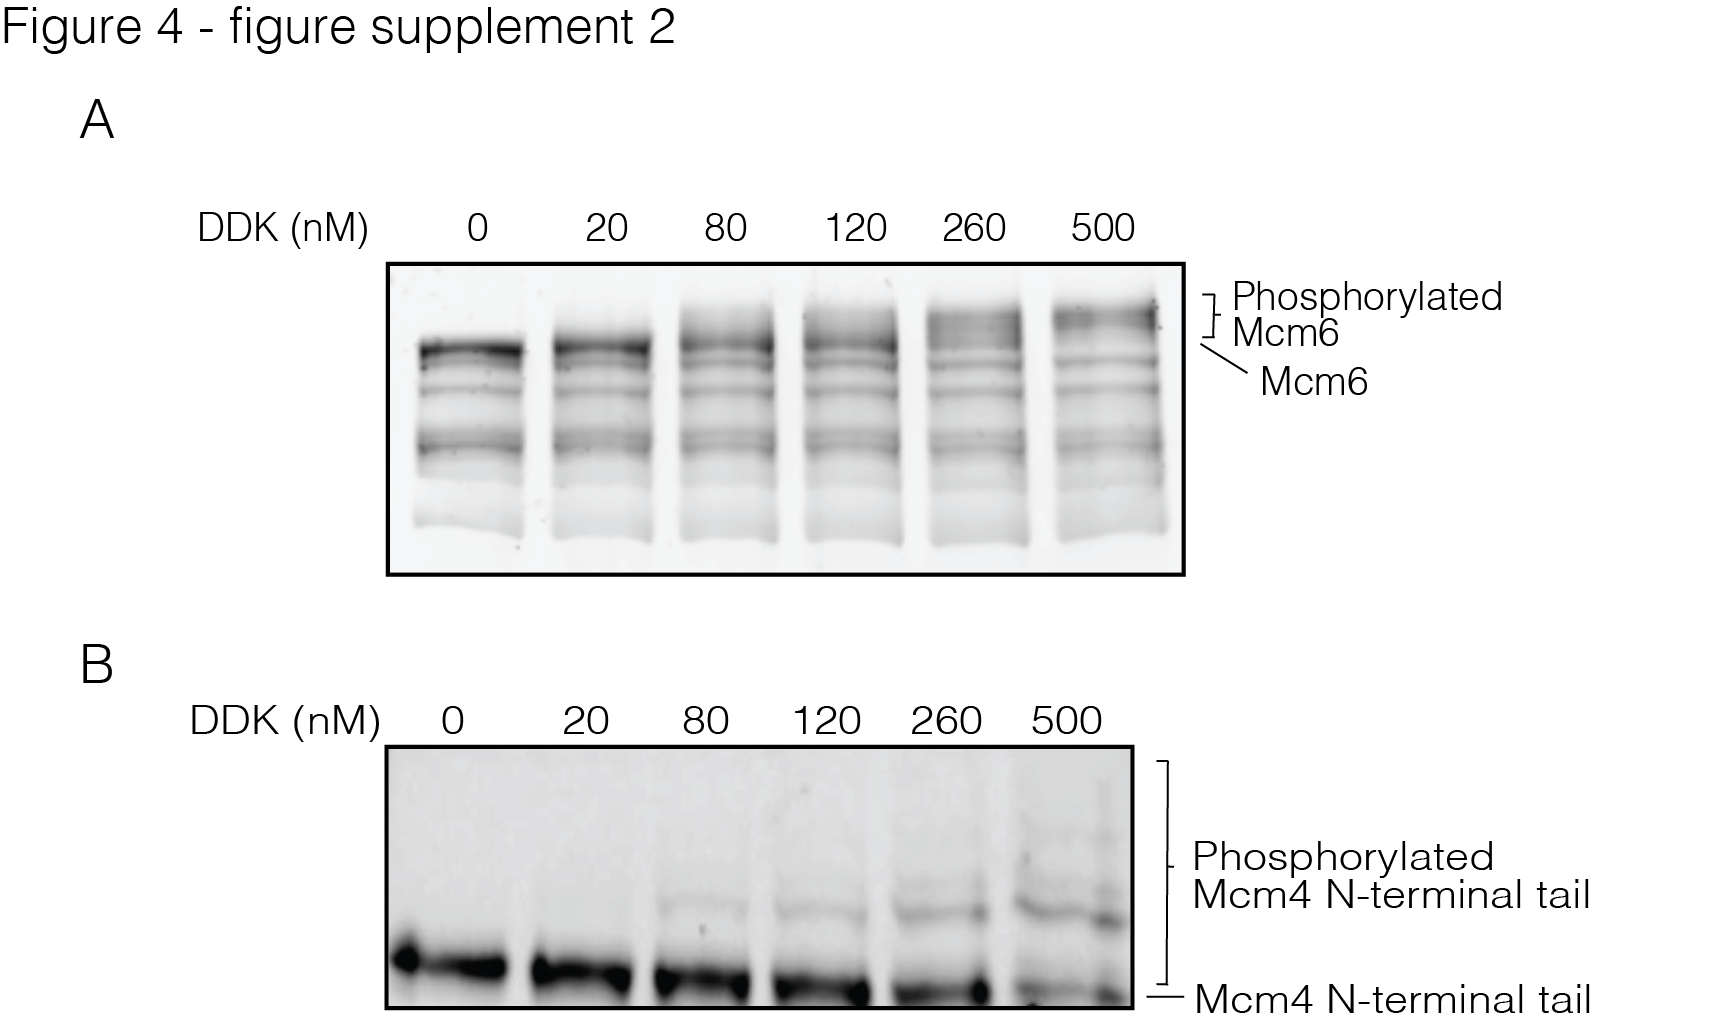

Supplement: supp [file elife-65471-supp-v1.zip › elife_poa_e65471_Figure_4_figure_supplement_2.tif]

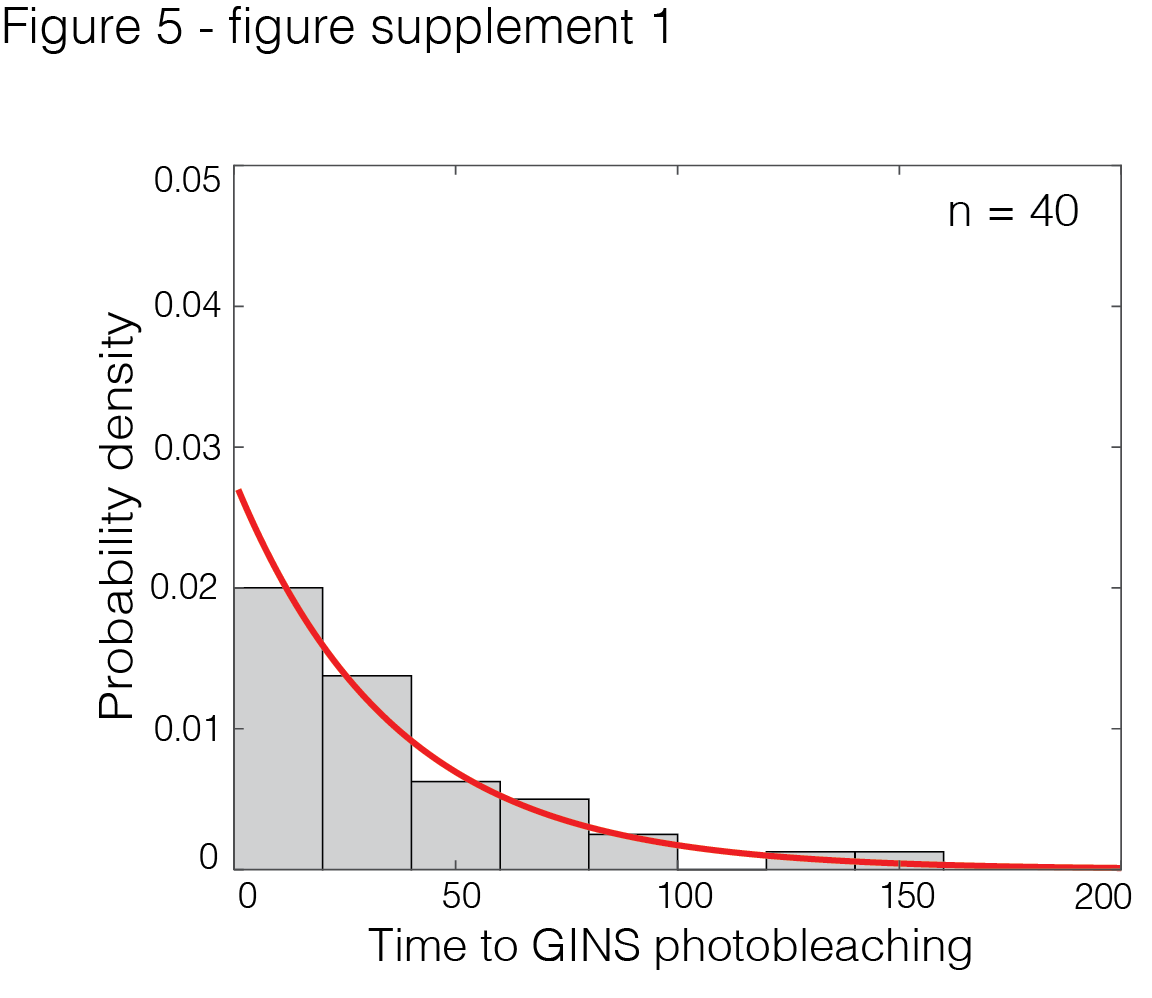

Supplement: supp [file elife-65471-supp-v1.zip › elife_poa_e65471_Figure_5_figure_supplement_1.tif]

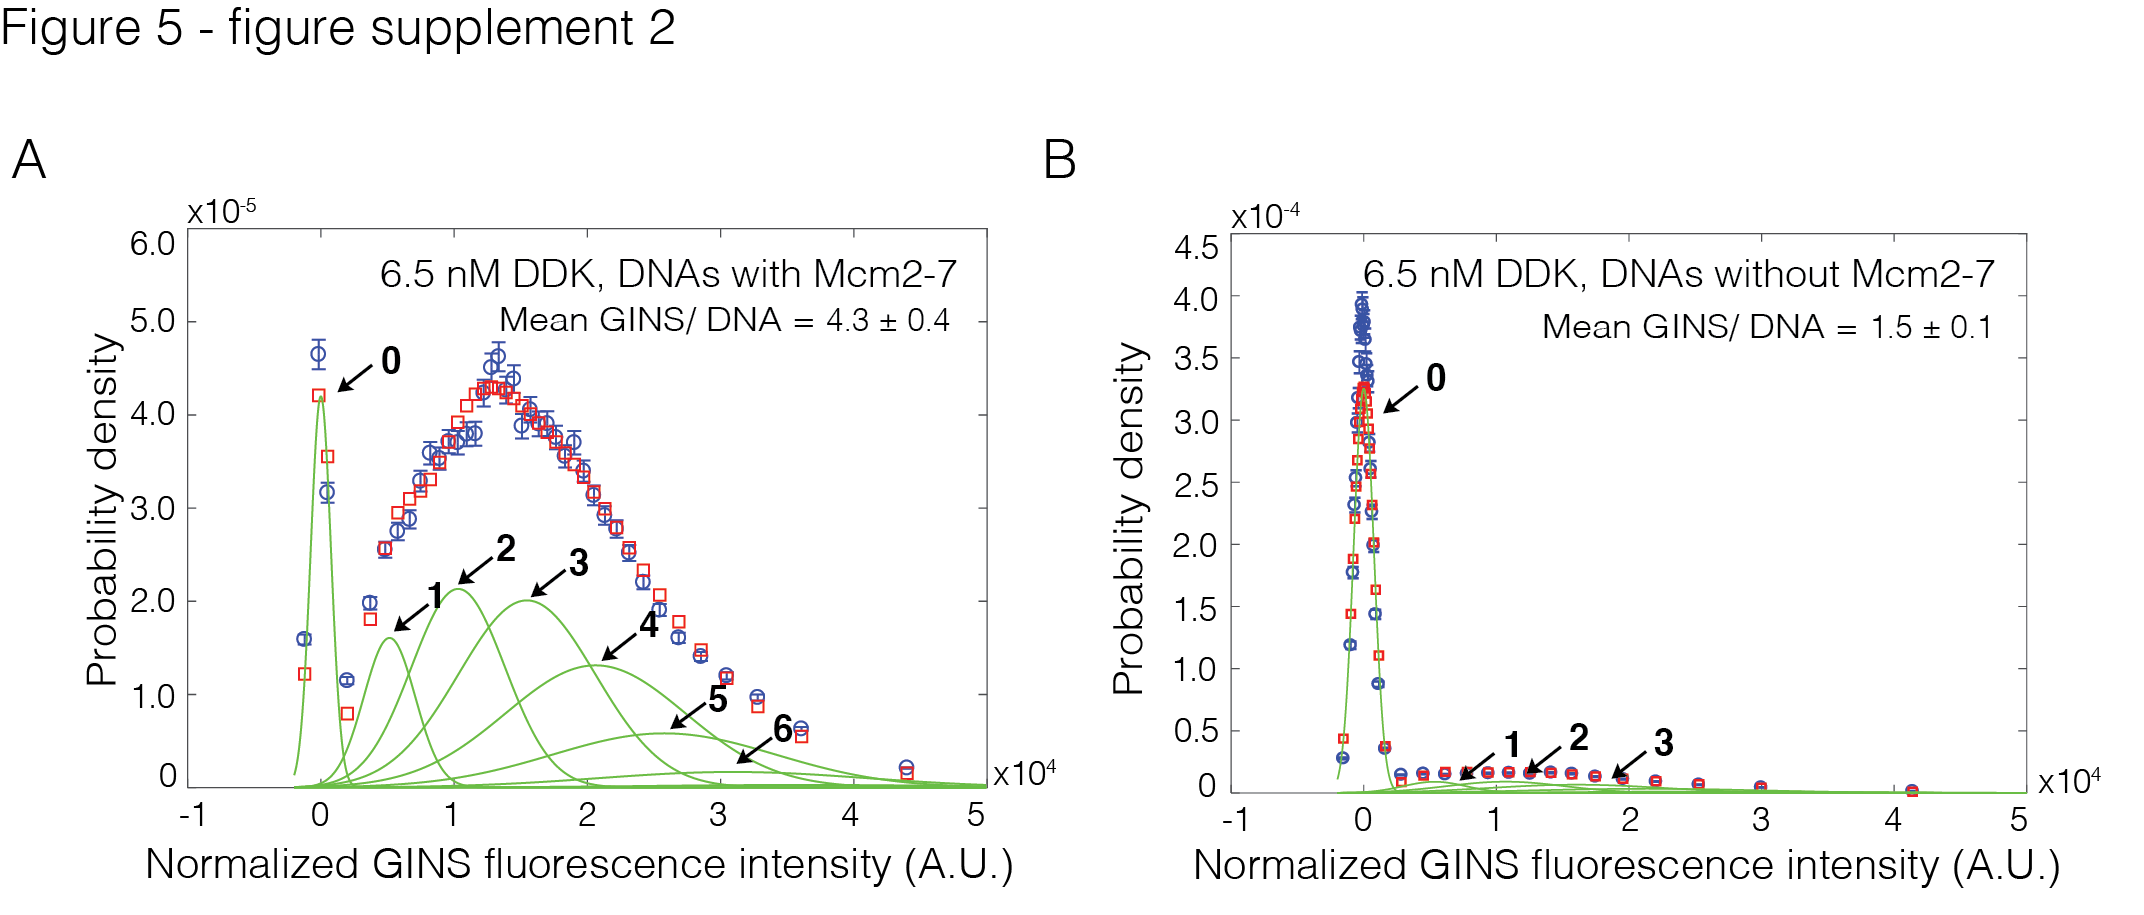

Supplement: supp [file elife-65471-supp-v1.zip › elife_poa_e65471_Figure_5_figure_supplement_2.tif]

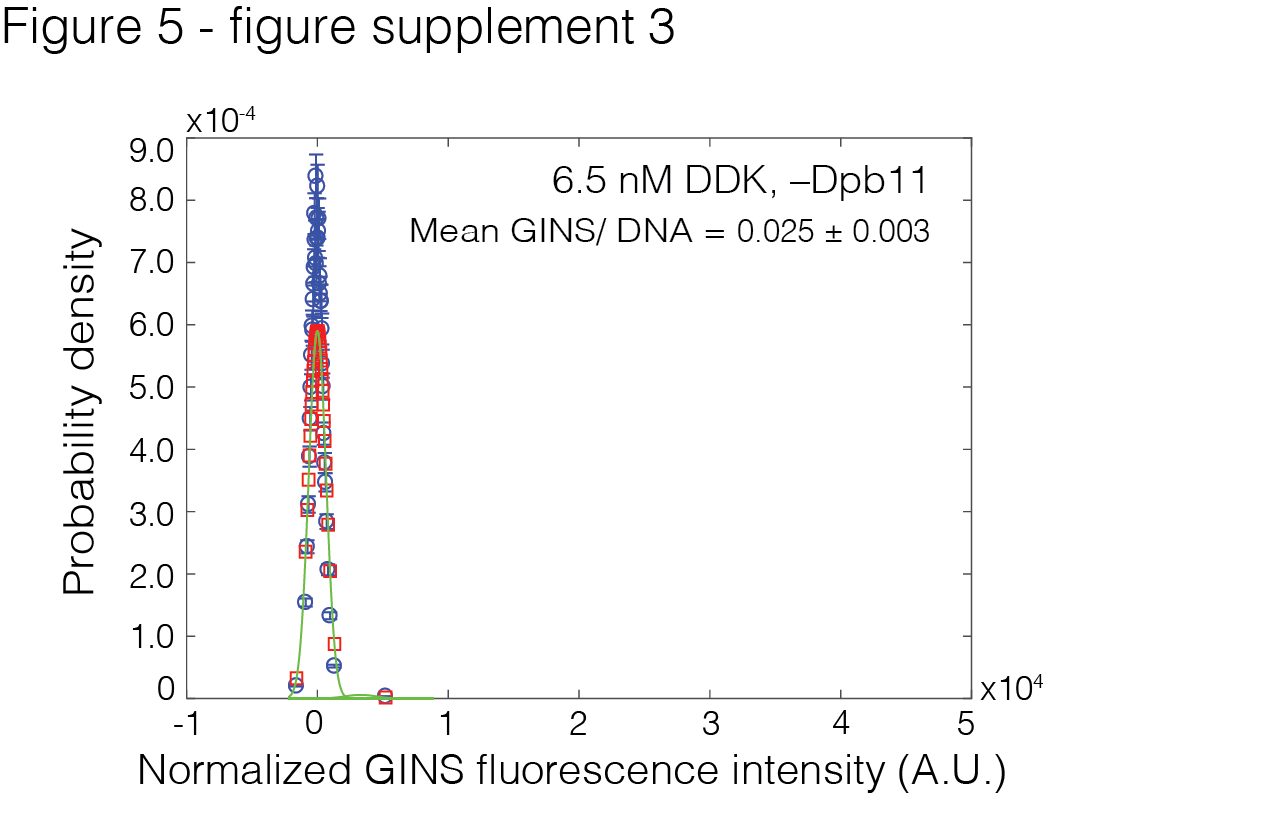

Supplement: supp [file elife-65471-supp-v1.zip › elife_poa_e65471_Figure_5_figure_supplement_3.tif]

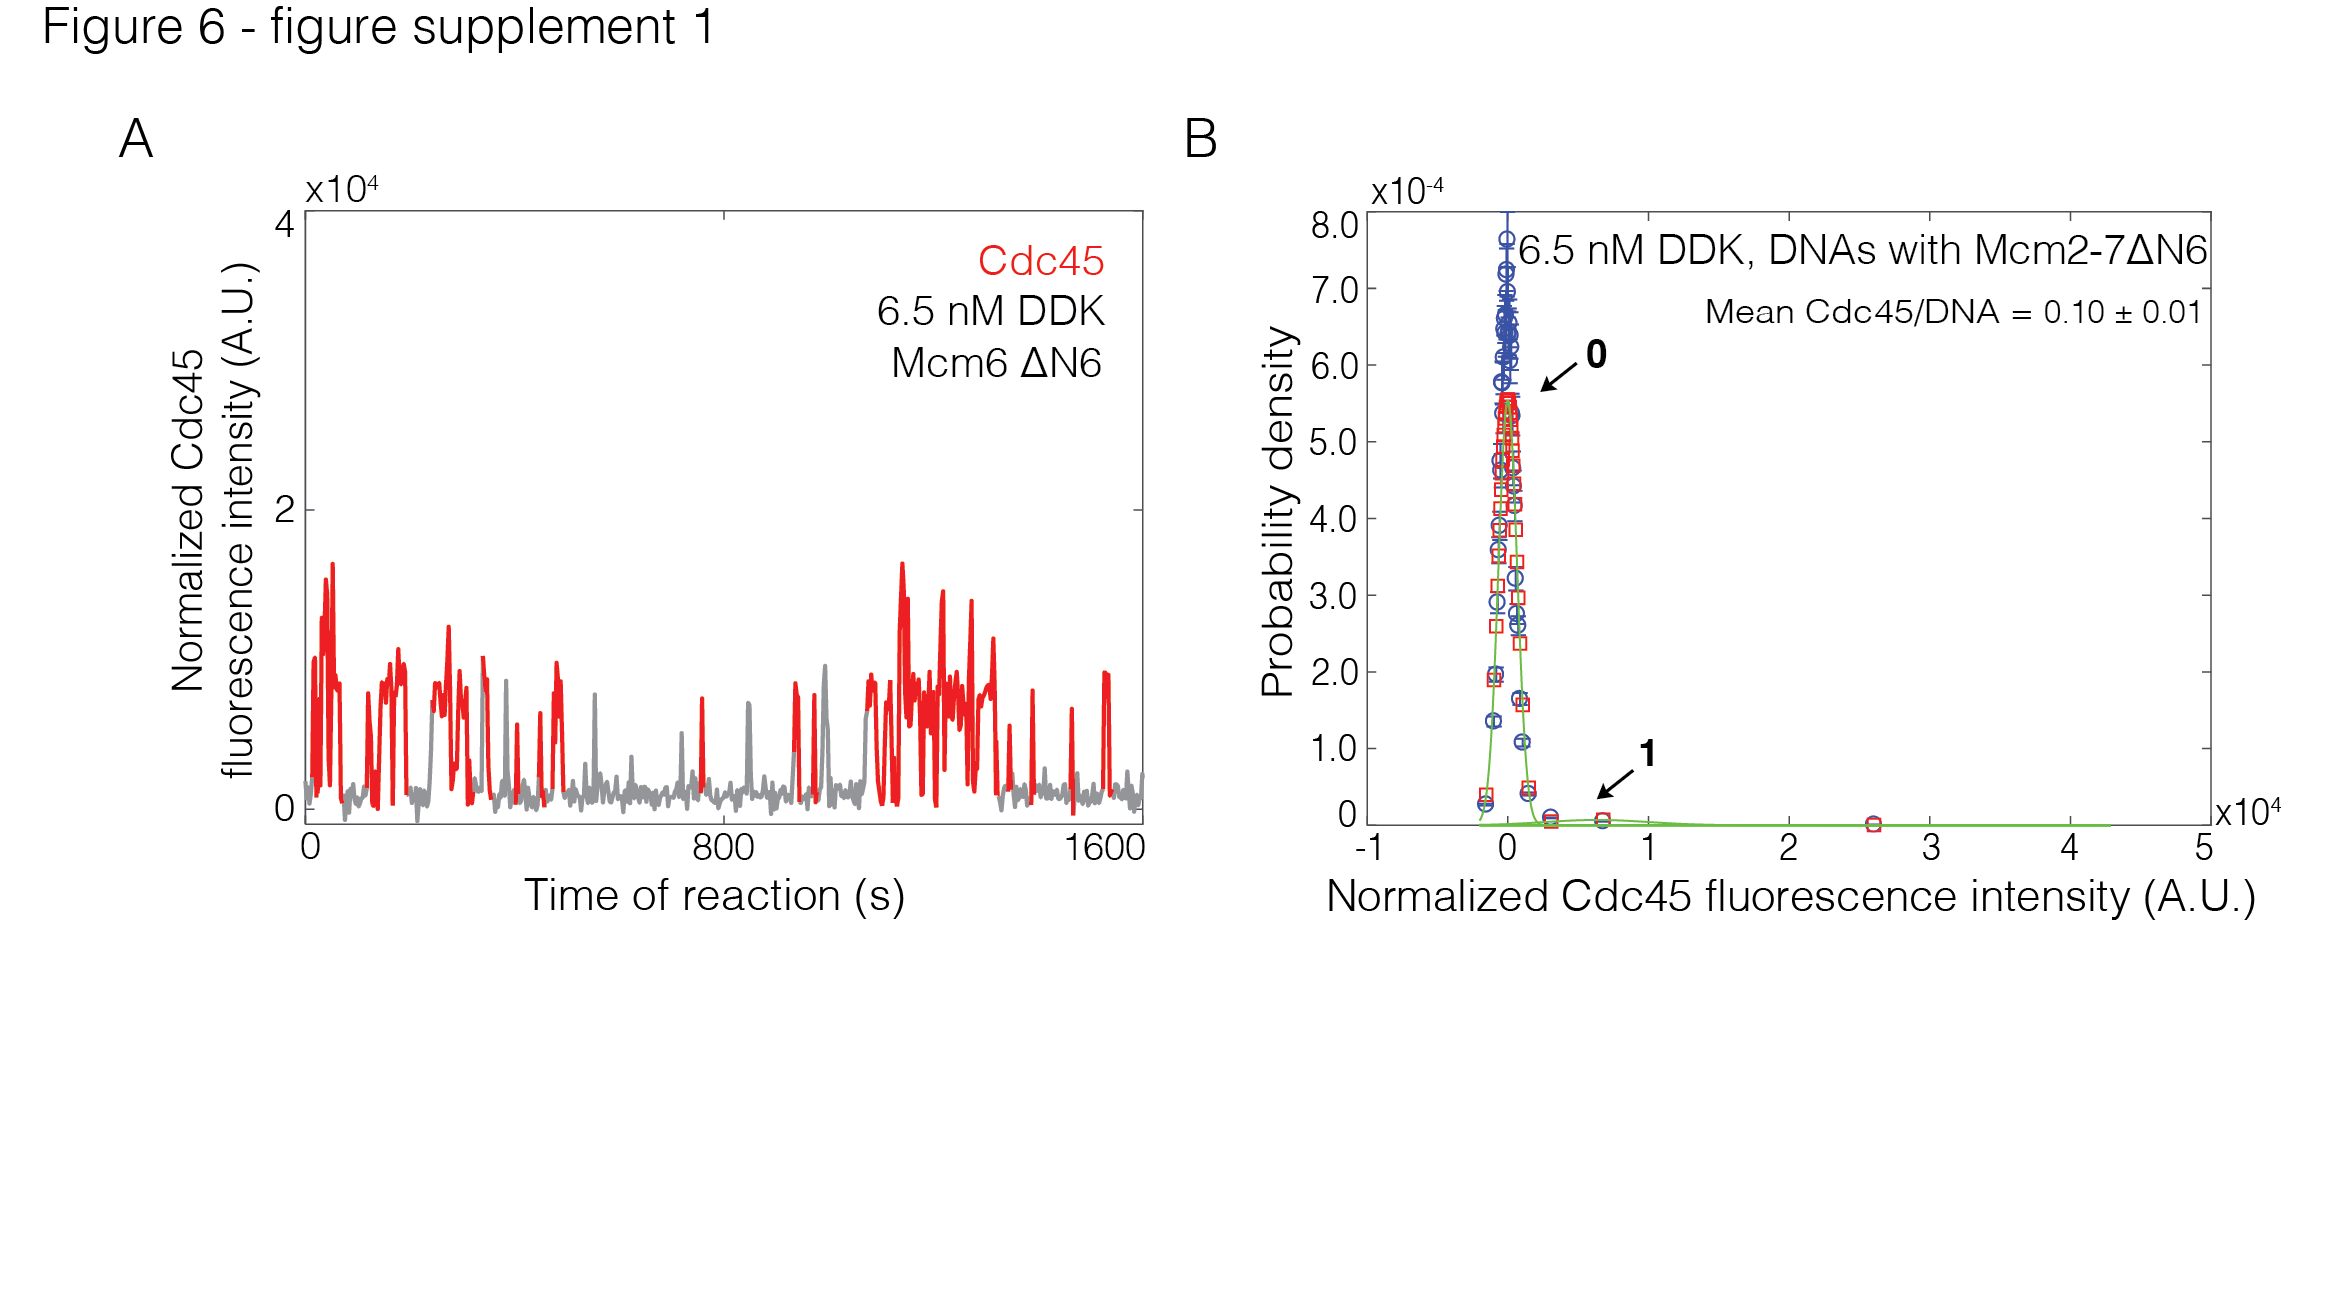

Supplement: supp [file elife-65471-supp-v1.zip › elife_poa_e65471_Figure_6_figure_supplement_1.tif]
